# Supplementary material for: The Gendered Impacts of Out-Of-Pocket Payments for Healthcare on Women in Sub-Saharan Africa-a Narrative Review Dolapo Ruth Adu, Muhammad Saddiq
Source: Research Square preprint supplement (doi:10.21203/rs.3.rs-8586641/v1), 2026-01-14
Supplement: Supplementary file 1 [file 471a571a7c5444d667b98623.docx]

# APPENDICES

## Appendix 1: Ethical Approval

**
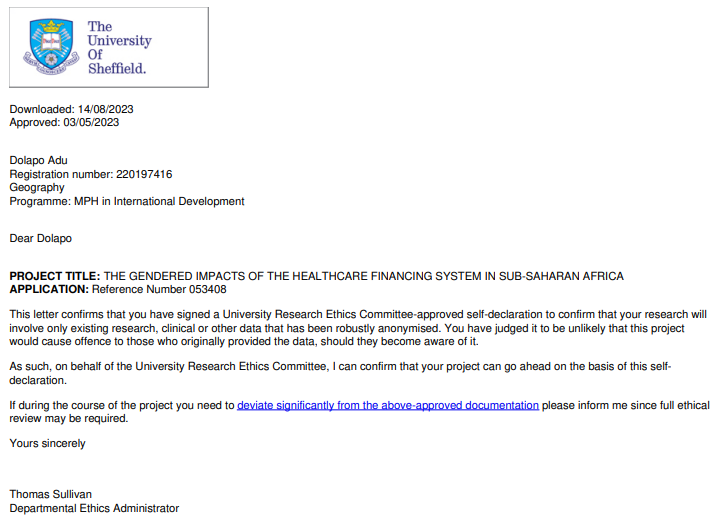
**

## Appendix 2: Search Strategy

The period of 2013-2023 was set as a limit for all searches within each electronic
database.

1. **CINAHL**

**Search date: 25/07/2023**

| **NUMBER** | **SEARCH** | **RESULTS** |
| --- | --- | --- |
| 1. | Gender OR Women OR Female | 70,473 |
| 2. | User fees OR Out-of-pocket payments OR OOPs OR User charges OR Cost recovery OR Health expenditure OR Health facility charges OR Fees and charges | 28 |
| 3. | 1 AND 2 | 149 |
| 4. | Sub-Saharan Africa OR SSA OR sub-Sahara OR Sub-Sahara | 2925 |
| 5. | 1 AND 4 | 1 |
| 6. | 3 AND 4 | 35 |
| 7. | Limit to English Language | 34 |

1. **Web of Science**

**Search date: 25/07/2023**

| **NUMBER** | **SEARCH** | **RESULTS** |
| --- | --- | --- |
| 1. | Gender OR Women OR Female | 26702 |
| 2. | User fees OR Out-of-pocket payments OR OOPs OR User charges OR Cost recovery OR Health expenditure OR Health facility charges OR Fees and charges | 1572 |
| 3. | 1 AND 2 | 9,289 |
| 4. | Sub-Saharan Africa OR SSA OR Sub Sahara OR Sub-Sahara | 719 |
| 5. | 1 AND 4 | 91 |
| 6. | 3 AND 4 | 144 |
| 7. | Limit 6 to English Language | 144 |

1. **PUBMED**

**Search date: 25/07/2023**

| **NUMBER** | **SEARCH** | **RESULTS** |
| --- | --- | --- |
| 1. | Gender OR Women OR Female | 3,558,846 |
| 2. | User fees OR Out-of-pocket payments OR OOPs OR User charges OR Cost recovery OR Health expenditure OR Health facility charges OR Fees and charges | 53,509 |
| 3. | 1 AND 2 | 20,209 |
| 4. | Sub-Saharan Africa OR SSA OR Sub Sahara OR Sub-Sahara | 131,229 |
| 5. | 1 AND 4 | 84631 |
| 6. | 3 AND 4 | 1140 |
| 7. | Limit 6 to English Language & Humans | 1063 |
| 8. | Limit 7 to females | 1019 |

1. **JSTOR**

**Search date: 24/07/2023**

| **NUMBER** | **SEARCH** | **RESULTS** |
| --- | --- | --- |
| 1. | Gender OR Women OR Female | 425,801 |
| 2. | User fees OR Out-of-pocket payments OR OOPs OR User charges OR Cost recovery OR Health expenditure OR Health facility charges OR Fees and charges | 9,422 |
| 3. | 1 AND 2 | 3,611 |
| 4. | Sub-Saharan Africa OR SSA OR Sub Sahara OR Sub-Sahara | 26,868 |
| 5. | 1 AND 4 | 15,100 |
| 6. | 3 AND 4 | 156 |
| 7. | Limit 6 to English | 143 |

1. **SCOPUS**

**Search date: 25/07/2023**

| **NUMBER** | **SEARCH** | **RESULTS** |
| --- | --- | --- |
| 1. | Gender OR Women OR Female | 5,379,404 |
| 2. | User fees OR Out-of-pocket payments OR OOPs OR User charges OR Cost recovery OR Health expenditure OR Health facility charges OR Fees and charges | 73 |
| 3. | 1 AND 2 | 40 |
| 4. | Sub-Saharan Africa OR SSA OR Sub-Sahara OR Sub-Sahara | 8788 |
| 5. | 1 AND 4 | 4,665 |
| 6. | 3 AND 4 | 2 |

1. **MEDLINE VIA OVID**

**Search date: 25/07/2023**

| **NUMBER** | **SEARCH** | **RESULTS** |
| --- | --- | --- |
| 1. | Gender OR Women OR Female | 3610359 |
| 2. | User fees OR Out-of-pocket payments OR OOPs OR User charges OR Cost recovery OR Health expenditure OR Health facility charges OR Fees and charges | 1346 |
| 3. | 1 AND 2 | 383 |
| 4. | Sub-Saharan Africa OR SSA OR Sub Sahara OR Sub-Sahara | 27828 |
| 5. | 1 AND 4 | 13606 |
| 6. | 3 AND 4 | 8 |

1. **COCHRANE CENTRAL REGISTER OF CONTROLLED TRIALS (CENTRAL)**

**Search date: 25/07/2023**

| **NUMBER** | **SEARCH** | **RESULTS** |
| --- | --- | --- |
| 1. | Gender OR Women OR Female | 616254 |
| 2. | User fees OR Out-of-pocket payments OR OOPs OR User charges OR Cost recovery OR Health expenditure OR Health facility charges OR Fees and charges | 6501 |
| 3. | 1 AND 2 | 21 |
| 4. | Sub-Saharan Africa OR SSA OR Sub-Sahara OR Sub-Sahara | 2736 |
| 5. | 1 AND 4 | 1564 |
| 6. | 3 AND 4 | 21 |

## Appendix 3: Data Extraction Table

- **Cross-sectional Studies**

| **No.** | **Author, Date & Country** | **Study Design** | **Sample Size & Participants** | **Aims & Objectives** | **Methods** | **Results** |
| --- | --- | --- | --- | --- | --- | --- |
| **1.** | Kaiser, J. L. et al. (2019) Zambia | Cross-sectional mixed-methods study | n=2280 Zambian women randomly chosen who had given birth during the previous 13 months | To evaluate the financial burden of childbirth for rural and underprivileged women in Zambia and contrast variations in delivery settings (primary health clinic, hospital, or home). | - A random sample of rural Zambian women was interviewed in-depth and participated in household surveys.  -Surveys collected participants' demographic information.  - Twenty questions were focused on delivery methods and the out-of-pocket expenses related to delivery during in-depth interviews. | **-** Women were still subject to various OOP payments even after the user fees for maternal healthcare services were eliminated.  - For expenses related to childbirth, such as infant clothes and delivery supplies, women allocated one-third of their household's monthly income.  - Compared to women who gave birth at home, women who gave birth in a hospital or primary health centre spent approximately $11.5 more overall on their delivery.  **-** OOPs during delivery may have prevented poor Zambian women from receiving facility-based obstetric care. |
| **2** | Ntambue, A. M. et al. (2019)  Congo | Cross-sectional and phenomenological study | n=1627 women in Lubumbashi, Congo, who gave birth at 92 medical facilities across its 11 health zones. | . To determine the contributing variables and effects on women and households in the study setting of catastrophic expenses (CE) related to obstetric and neonatal care. | - Cross-sectional study using mixed methodologies and phenomenological research  - Participants' information regarding their healthcare and living costs was gathered in April and May 2015 to determine the prevalence of CE.  - Two months following discharge, semi-structured interviews with 58 women were undertaken to learn more about the effects of CE. | **-**16% of participants experienced Catastrophic expenses.  - The risk of CE was higher in women who had complications during labour and delivery, were young, poor, single, and gave birth in a parastatal hospital or with skilled medical personnel.  -Women who suffered CE were forced to cut household food consumption, incur debt, lose their commercial revenue, and were unable to pay their rent or their children's school tuition. Others suffered verbal abuse from spouses and in-laws, were dumped by lovers, had their fathers' paternity denied, went through divorce, and were deprived of their financial means. |
| **3** | Dalaba, M. A. et al. (2022)  Ghana | Cross-sectional study | n=500 reproductive-age women from three districts in Ghana's upper west (Nadowli district, Wa West district, and Sissala East district) who gave birth between January 2013 and December 2017 were included in the study. | To investigate the OOP Payments made by mothers in Ghana's Upper West during childbirth. | - A systematic questionnaire including questions on sociodemographic traits, place of childbirth, cost of childbirth, and household wealth was used to gather data between January and April 2018. | **-**Despite the free maternal health care policy's introduction, 85% of insured women made OOPPs for direct and indirect medical costs, spending an average of USD 7.5.  - Due to the lack of medicines, laboratory reagents, and ultrasound machines at the healthcare institutions, women had to pay OOP for these goods and services at private facilities. Direct OOP payments were made for medical supplies.  - In comparison to middle-class or rich women, women from the poorest households experienced greater OOP payments during childbirth and were more likely to develop CHE, which could exacerbate their poverty.  -21% of participants experienced CHE from OOP costs most especially those that delivered at the hospital or primary health centres compared to those that delivered at home.  **-** The largest non-medical OOP expense incurred by participants was informal payments made to healthcare providers, and both insured and uninsured women had to pay OOP for other direct non-medical items like disinfectant, rubber bedspreads, cotton, gauze, childbirth mats, and spirit that were supposed to be covered by the free maternal health insurance.  - Participants reported significant non-medical expenses such transportation fees, which limited their ability to use maternal healthcare services. |
| **4** | Juma, K. et al. (2021)  Kenya | Cross-sectional study | n=3025 women who experienced or sought care for a potentially fatal condition or a maternal near-miss incident either during pregnancy, childbirth, or within 42 days of giving birth or terminating the pregnancy inside the research institutions. | To identify the direct costs of treating pregnant women with fatal diseases and near-fatal events, as well as the factors that lead to these women having to pay out-of-pocket for their healthcare, | A structured interview was conducted in conjunction with a clinical study questionnaire to gather information on sociodemographic traits and the direct medical and non-medical expenditures associated with treating maternal near-miss incidents. | -The majority of patients with maternal near-misses paid OOP for their medical care.  -Over a quarter of patients with severe obstetric conditions such as pregnancy-related infections, abortion complications and ectopic pregnancy complications who paid OOP experienced catastrophic costs. Such complications required longer hospital stays, complex treatment and drugs, and highly specialised healthcare providers which contributed to high costs of care. |
| **5** | Nyengidiki T.K. et al. (2019)  Nigeria | Cross-sectional study | n= 167 women between the ages of 20-70yrs who presented to the study facility for pap smear screening. | To assess how user fees affect the use of pap smear screening services in a newly built tertiary health centre in Port-Harcourt, Nigeria. | -A cross-sectional descriptive study of women presenting for Pap smear screening at the study hospital from 1 February 2014 to 1 March 2014.  - In addition to their sociodemographic details and proximity to the screening facility, information was gathered on the number of women who visited the clinic during the free pap smear screening period.  -Same data was collected one month after the introduction of a pap smear screening fee and over a 7-month period. | **-** After the user charge was implemented, there was a noticeable decline in the use of the cervical cancer screening service.  **-**There was no correlation between patients' distance from the hospital and their use of cervical cancer screening services. |
| **6** | Onah, M. N. and Govender, V. (2014)  Nigeria | Cross-sectional survey and focus group discussions | n= 411 households found in the rural and urban sections of Nsukka Local Government Area (NLGA), in southern Nigeria's Enugu State | To examine the gendered effects of OOPs on the use of healthcare in southern Nigeria | -Cross sectional household survey and single sex focus group discussions consisting of 8-11 participants and was conducted in 1 urban and 2 rural communities.  -Questions about households' socioeconomic and demographic status, general household and healthcare expenditure patterns, household assets, utilisation patterns, healthcare financing, intra-household decision-making, and coping mechanisms were covered in household surveys and focus group discussions. | **-** Female headed households (FHHs) reported lower use of healthcare services and higher levels of untreated morbidity due to the inability to afford the costs of healthcare. This demonstrates that the most vulnerable to catastrophic expenses also do not seek care due to lack of affordability.  - When compared to MHHs, FHHs suffered a larger health cost burden that was catastrophic, especially for the two poorest categories.  - Both FHHs and MHHs used their savings, the sale of assets (such as goats and farm products), and borrowing from friends, neighbours, money lenders, and family members as coping mechanisms to make OOP payments.  -Women, especially widows were seen to have been more desperate in paying back debts by cutting food consumption in the house, working tedious jobs like working on construction sites which affects their overall health outcomes and contributes to a higher sickness burden and in turn require care (medical poverty trap). |
| **7** | Dim, C. C. *et al.* (2015)  Nigeria | Cross-sectional Study | n= 400 HIV-positive women between the ages of 21 and 40 who received treatment at an adult HIV clinic at the University of Nigeria Teaching Hospital (UNTH), Enugu, Nigeria, | To determine whether HIV-positive women are willing to pay out-of-pocket for cervical cancer screening. | -Over the course of three months, participants completed a pretested structured questionnaire to gather information on sociodemographic traits, awareness of cervical cancer and pap smears, and the frequency of cervical cancer screening.  -Afterward, participants were informed about OOP costs for pap smear and their willingness to pay was investigated. | - Despite the cost, the majority of participants were willing to pay out-of-pocket for cervical cancer screening, and this was attributed to the post-HIV test counselling that women got.  -However, the study didn’t look at women’s ability to pay despite being willing to. |
| **8.** | Ajaegbu, O. O. (2017)  Nigeria | Cross-sectional survey | n= 400 women between the ages of 15 and 49, including midwives, traditional birth attendants, and leaders of women in the public sector, the agricultural industry, and other fields. | . To determine the availability of and factors affecting women in the Isiekenesi community of Imo State, Nigeria's usage of prenatal healthcare services | - Participants' information was gathered through focus groups, in-depth interviews, and questionnaire surveys. | -The difficulty of women to pay for prenatal healthcare services during pregnancy was the main factor influencing their decision to seek prenatal care. Women choose to use conventional birth attendants and had home births as a result. |
| **9.** | Ilboudo, P. G. C. *et al.* (2015)  Burkina Faso | Cross-sectional study | n= 305 women who either underwent spontaneous or induced abortions in two health facilities in Ougadougou, Burkina Faso. | . To evaluate the costs, effects, and problems of induced abortions | - Data on socioeconomic background, health expenditures, and pre-referral costs, including those for medications, ultrasounds, lab tests, and transportation, were gathered using a main questionnaire that had undergone pilot testing.  - Medical data, such as post-abortion complications, were gathered from hospital records using a brief questionnaire. | - Due to the increased hospital expenditures for treating complications related to induced abortions, induced abortion costs for women were much higher than those for spontaneous abortions.  - Induced abortion OOP fees were expensive and caused women and their families to incur catastrophic costs.  - According to the study, women's lack of control over household finances and high OOP expenses may have contributed to lengthy delays in decision-making regarding access to abortion healthcare services, which in turn contributed to greater costs for treating complications.  -Coping strategies included borrowing money at high interest rates and use of entire savings.  -The national subsidy policy in Burkina Faso did not cover the entire cost of postabortion care most especially abortion complications |
| **10.** | Cowgill, K. D. and Ntambue, A. M. (2019)  Congo | Cross-sectional study mixed methods study | n=85 women who underwent postpartum treatment at the study hospital's maternity unit between August 5 and September 15, 2016. | -To identify the number of mothers and their babies who were held at a provincial hospital in the Democratic Republic of the Congo for six weeks in 2016 because they couldn't afford to pay OOP payments for medical treatment  - To ascertain the behaviours and attitudes of the medical professionals about OOP detention and payment for treatment. | -Participants in a cross-sectional survey completed a questionnaire with closed-ended questions to obtain information on their demographic and socioeconomic status, the course and outcome of the pregnancy from which they had just given birth, their care-seeking history (i.e., where they first sought care, whether they were referred, how they arrived at the medical facility), and the costs associated with the delivery.  -Key informant interviews were done with hospital staff to gather information on the actual fees for delivery, their understanding and opinions of the reason behind women’s detainment and what could be done for women who couldn’t pay their hospital fees. | -Due to their incapacity to cover OOP healthcare expenditures and unpaid costs ranging from USD 21 to 515, 52% of women were forcibly kept in the hospital for up to one month.  - Women's inability to pay for healthcare treatments was primarily caused by poverty and expensive birth complications. Women who have been raped or sexually assaulted and become pregnant, unmarried women, women who have been abandoned by their families or partners, and internally displaced women have all been linked to poverty. |
| **11.** | Gbagbo, F. Y. (2020)  Ghana | Retrospective Cross-sectional mixed method study. | n= 428 women sought elective abortions (320) and were treated for post-abortion complications (81) in 6 health institutions, including public (2), private (2), and non-governmental organisations (2) between January and December 2018 in Accra, | To evaluate the effects of abortion fees on the evaluation of safe abortion services for young people in Ghana | Participants' sociodemographic details, decisions on abortion, the procedures involved in terminating a pregnancy, and its cost were all gathered through the use of questionnaires and semi-structured in-depth interviews. | - Particularly the surgical procedures, which cost three times as much as other methods due to the cost of anaesthetics and antibiotics, functioned as substantial barriers to accessing safe abortion treatment in Accra.  - Due to high costs, young, unemployed people were more likely to delay seeking medical care for complications following unsafe abortions and were more inclined to terminate their pregnancies after the first trimester. However, the price of abortion did not affect women who were in committed marriages and had jobs. |
| **12.** | Angèle, M. N. et al. (2021)  Congo | Cross-sectional mixed method study  (Exploratory Sequential) | n=14 participants in the qualitative study (8 mothers, 2 family members, and 4 healthcare professionals).  Quantitative n= 411 pregnant women who gave birth at 10 referral hospitals | - To research and evaluate the social and financial effects of the price of maternity and newborn care in Lubumbashi, Democratic Republic of the Congo | A quasi-experimental descriptive study that compared participant cohorts before and after the intervention was conducted at the study location to gather data.  From March 2014 to September 2015, participants were interviewed twice as part of a baseline and endline survey. Details about sociodemographic traits, anthropometric measures, ANC knowledge, attitudes, and practises, as well as OOP costs and travel time. | - According to the study, women and their families who could afford OOP health care expenditures either spent all of their savings or had to cut back on their personal needs, while those who couldn't afford them were detained in the hospital.  **-** According to the study, hospitalisation resulted in the mother's extended absence from the home, a decrease in household income, arguments amongst family members, and the husband leaving the house. |

**Secondary Data Analysis**

| **No.** | **Author, Date & Country** | **Study Design** | **Sample Size & Participants** | **Aims & Objectives** | **Methods** | **Results** |
| --- | --- | --- | --- | --- | --- | --- |
| **1.** | Franke, M. A. et al. (2022)  Madagascar | Secondary data analysis | n=957 women who needed maternal care or were experiencing birth-related problems between September 23, 2019, and February 22, 2020 at the study hospitals | To ascertain the extent of catastrophic health costs endured by women receiving maternity care at facilities run by religious organisations in Madagascar. | - Patient invoices and records from an NGO that ran a maternal health project at the study hospitals were used as secondary data sources.  -Patient records included participants' age, diagnosis at admission, treatment details, and referral information | **-** High levels of CHE were incurred through direct patient costs (10% threshold: n=486/890, 54.6%; 25% threshold: n=366/890, 41.1%).  **-** Compared to women who gave birth naturally vaginally, women who underwent emergency surgical obstetric care, such as Caesarean sections, experienced a greater rate of CHE.  **-** OOP payments for maternity care are likely to add to Madagascar's high poverty rates and discourage women from seeking these services. |

**Qualitative Studies**

| **No.** | **Author, Date & Country** | **Study Design** | **Sample size & Participants** | **Aims & Objectives** | **Methods** | **Results** |
| --- | --- | --- | --- | --- | --- | --- |
| **1.** | Foerster, M. et al. (2019)  Uganda, Nigeria, Namibia | Prospective Cohort Study | n=2265 women who were 18 years of age or older and who were diagnosed with breast cancer in the study hospitals (either clinically or through histological confirmation). | To research and evaluate the disparities in the management of breast cancer between SSA nations. | - Breast cancer treatment information for participants was systematically gathered from medical records, and follow-up interviews with women were conducted after six months. | **-**Women reported refusing breast cancer treatment because of the costs of treatment  - In Nigeria and Uganda, where healthcare costs were covered out-of-pocket, the percentage of untreated patients was highest (38% and 18%, respectively). The majority (98.7%) of black women and all non-black women (100%) in Namibia, where treatment is free for patients, have started seeking help. |
| **2.** | Vossius, C.et al. (2021)  Tanzania | Prospective Observational study | n= 28,601 births that occurred in all delivery rooms and operating theatres in the study hospital. | To investigate how user fees affect the population of women giving birth at the study hospital in order to document any potential effects in the time after the implementation of user fees. | - A review of information gathered from February 2010 to January 2017 as part of a prospective observational research carried out at Haydom Lutheran Hospital in rural Northern-Central Tanzania.  - Complications of pregnancy, the course and results of labour, information on the newborn, and the birth attendant were all collected.  - Data from the time before the introduction of user fees, from February 2010 to June 2013, and the time following, from January 2014 to January 2017, were compared.  - Numerous variables were examined, such as birthrate, multiple births, prenatal care, gestational age, birth weight, foetal presentation (cephalic or non-cephalic), and macerated stillbirths. | **-** At the research hospital, labour difficulties and caesarean sections increased to roughly 80 CSs per 1000 births after the implementation of ambulance and delivery fees, which may indicate that women put off seeking expert birth attendants because of higher OOP expenditures. |
| **3.** | Oshi, D. C. et al. (2016)  Nigeria | Qualitative descriptive study | n=56 (46 women and 10 men) living within three senatorial zones in Ebonyi state, southern Nigeria. | To investigate how gender-related factors influence women's health and their desire for TB treatment in Ebonyi State, Nigeria. | An interview guide that collected information on the sociodemographic traits of participants, their knowledge about TB, and their sources was used to conduct in-depth interviews.  To investigate the social, economic, and cultural ideas that influence household decision-making, in-depth interviews were also conducted. | **-**Women made frequent out-of-pocket expenditure in purchasing medicines for their children from patent medicine vendors and the men only got involved when it entailed going to a major healthcare facility.  - Poor women's out-of-pocket expenses increase their deprivation and deter them from getting TB treatment at healthcare facilities.  -Women faced more difficulties having to pay for TB healthcare services with little or no support from relatives therefore depriving their access to healthcare.  -Women had no control over their earnings to seek care and it is the men that are in charge of the earnings and dictate the amount to be spent on healthcare seeking which further aggravates the restrictions they face in seeking care for TB. |
| **4.** | Klein, M. C. et al. (2016)  Mali  . | Qualitative study | n= 83  Participants included women who attended ANC and received intermittent preventive treatment for malaria at the study hospital, midwives, pharmacists, physicians, community health workers, teachers, district officials, and husbands. | To investigate the role that both actual and perceived costs play in preventing women in Mali from utilising IPTp in the context of the post-Bamako Initiative. | Between August 2013 and April 2014, information was gathered in four rural health zones in Mali, two in Sikasso and two in Koulikoro, using 37 semi-structured in-depth interviews, 26 focus groups, and 20 observations. | -Pregnant women incurred OOP costs for ANC cards, gloves or other materials that healthcare providers needed which prevented them from attending regular ANC visits.  -Only initial doses of IPT are free and pregnant women had to pay additional costs for the next doses and when there were stock-outs.  - Women had to ask their husbands, mothers-in-law, husbands' older brothers, or fathers for permission to attend ANC appointments, and they also had to ask them for money to cover OOP expenses.  - Women stated that they still had to find money to pay for ANC, such as borrowing from family members, despite the lack of autonomy.  - Women may have had fewer ANC visits or less services available to them due to the difficulty they had establishing funding sources for ANC services. |
| **5.** | Ntoimo, L. F. C. et al. (2019)  Nigeria | Qualitative study | n= 183 (106 males and 77 females) sampled from two LGAs in Edo State in southern Nigeria. | To investigate the reasons why women in Nigeria's Edo state don't use skilled maternity care. | From July 29 to August 16, 2017, 20 focus group discussions (FGDs) with married men and women were conducted. The use of maternal and child health care services at the primary healthcare facilities, as well as participant preferences, beliefs, and views about maternal health, were all recorded. | **-** Participants identified the direct cost of care in the primary health care facilities as a deterrent to using skilled maternal care.  - A barrier to not using PHC clinics for prenatal care was the inability to pay for OOP expenses.  - One of the reported reasons for using herbs for pregnancy care in ESE is a lack of funding.  - The PHCs' requirement for unofficial payments in the form of cleaning supplies, towels, and other items served as another barrier to the utilisation of expert prenatal care.  - In addition, the study revealed that women may be willing to pay for services if PHCs offered higher-quality care and were easier to obtain. |

**Quantitative Studies**

| **No.** | **Author, Date & Country** | **Study Design** | **Sample size & Participants** | **Aims & Objectives** | **Methods** | **Results** |
| --- | --- | --- | --- | --- | --- | --- |
| **1.** | Ouédraogo, C. T. *et al.* (2021)  Niger | Quasi-experimental descriptive study | n=1736 pregnant women in two health districts in the Zinder region of Niger who reported visiting ANC. | - to evaluate the OOP payment expenses paid by pregnant women visiting ANC at the research site  -To calculate the time spent by women attending ANC and the time's opportunity cost.  -To assess how OOP costs and time spent affected women’s ANC attendance. | Pregnant women's pre- and post-intervention cohorts were compared in quasi-experimental descriptive research conducted in the Zinder, Niger, region. | - The majority of pregnant women in Niger had to pay OOP expenses such consultation fees, transportation costs, pharmaceutical prices, and clinical investigations in order to obtain ANC, despite the country's national exemption of user fees for women.  - According to the study, pregnant women who reported paying OOP for ANC were more likely to attend a subsequent ANC visit.  **-**Receiving incentives such as insecticide-treated bednets and iron-folic acid supplements were associated with high ANC attendance. |

## Appendix 4: Identified Themes and Codes

| **Themes** | **Category** | **Codes** |
| --- | --- | --- |
| **Access to healthcare services** | - **Socioeconomic status of women** | - **Socioeconomic Class Variation** - **Economic Stability and Healthcare Access** - **Poverty and Maternal Healthcare Access** - **Impact of Wealth on Childbirth Costs** - **Household Income and Abortion Services Access** - **Socioeconomic Status and Delayed Maternal Care** |
| - **Type of reproductive healthcare service** | - **Reproductive Healthcare Costs** - **Delivery Costs and Facility-Based Birth** - **Abortion Services Accessibility** - **Impact of Abortion Costs on Induced Abortions** - **Antenatal Care Access and OOP Payments** - **Antenatal Care Direct Costs and OOP** |
| - **Type of OOP expenditure** | - **Direct Medical Costs** - **Delivery Supplies and Non-Medical Costs** - **Non-Medical Costs: Baby Clothes** - **Informal Payments and Non-Medical Barriers** - **Transportation Costs and Access to Care** |
| **Utilisation of healthcare services** | - **Management of chronic illnesses** | - **Chronic Illnesses and OOP Payments** - **Cervical Cancer Screening and User Fees** - **Breast Cancer Treatment Delay and OOP** - **Tuberculosis Treatment and Prior OOP Experiences** |
| - **Economic empowerment of women** | - **Financial Constraints and Gender Differences** - **Female-headed households and Healthcare Access** - **Husbands' Control over Financial Resources** |
| - **Financial decision-making power within households** | - **Patriarchal Decision-Making and ANC Attendance** - **Male Control over Financial Decisions** - **Male Perception of Illness and Health Seeking** - **Women's Decision-Making Limitation and OOP** |
| **Outcomes** | - **Catastrophic health expenditure** | - **Catastrophic Health Expenditure (CHE)** - **CHE and Delivery-Related Expenses** - **Obstetric Complications and CHE** |
| - **Inability to pay** | - **OOP Payments and Inability to Pay** - **Hospital Detainment and Inability to Pay** - **Consequences of Hospital Detainment** |
| - **Coping mechanisms** | - **Adaptation strategies for OOP Payments** - **Recovery Strategies and OOP Payments** |
